# Supplementary material for: Host gill attachment causes blood-feeding by the salmon louse (Lepeophtheirus salmonis) chalimus larvae and alters parasite development and transcriptome
Source: PubMed Central journal article supplement (PMC7201535; doi:10.1186/s13071-020-04096-0), 2020-05-06
Supplement: 13071_2020_4096_MOESM11_ESM.pdf [file 13071_2020_4096_MOESM11_ESM.pdf]

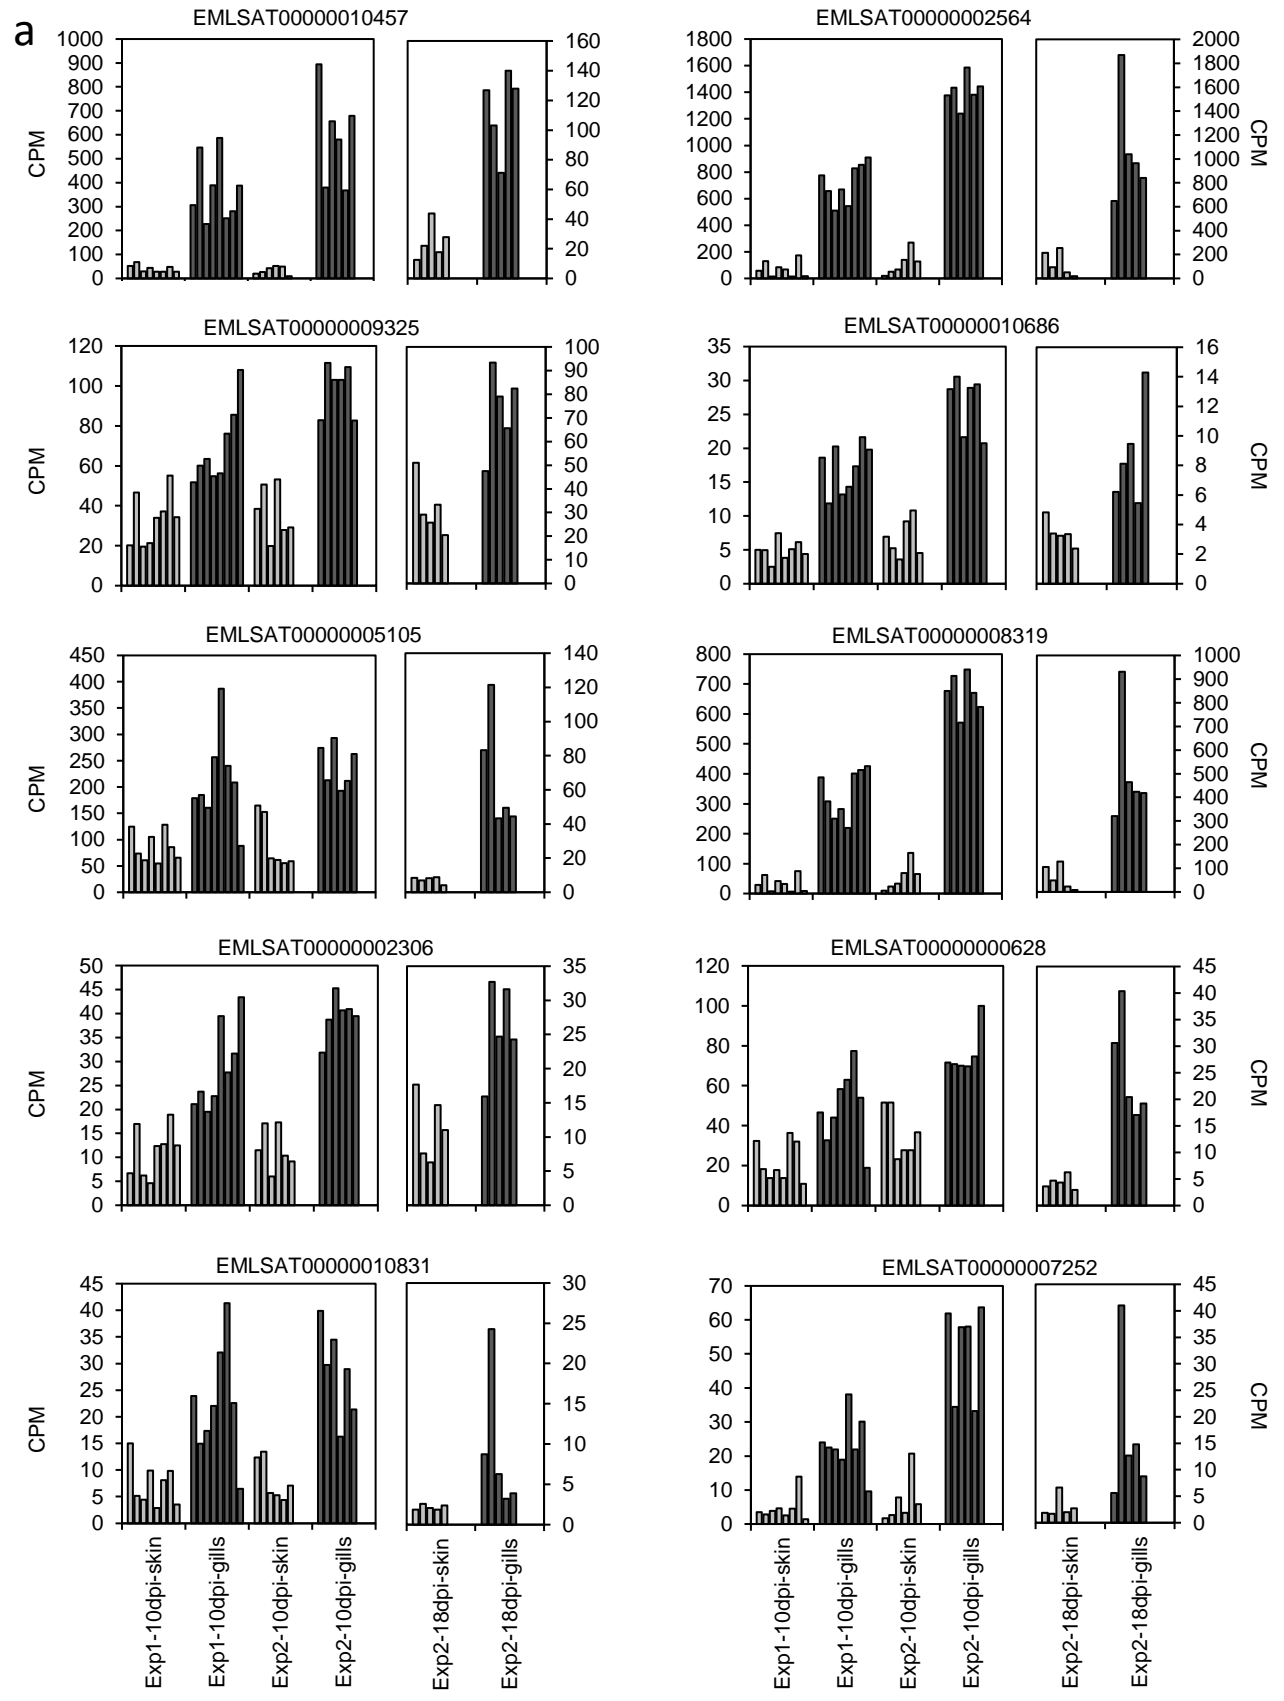

**b**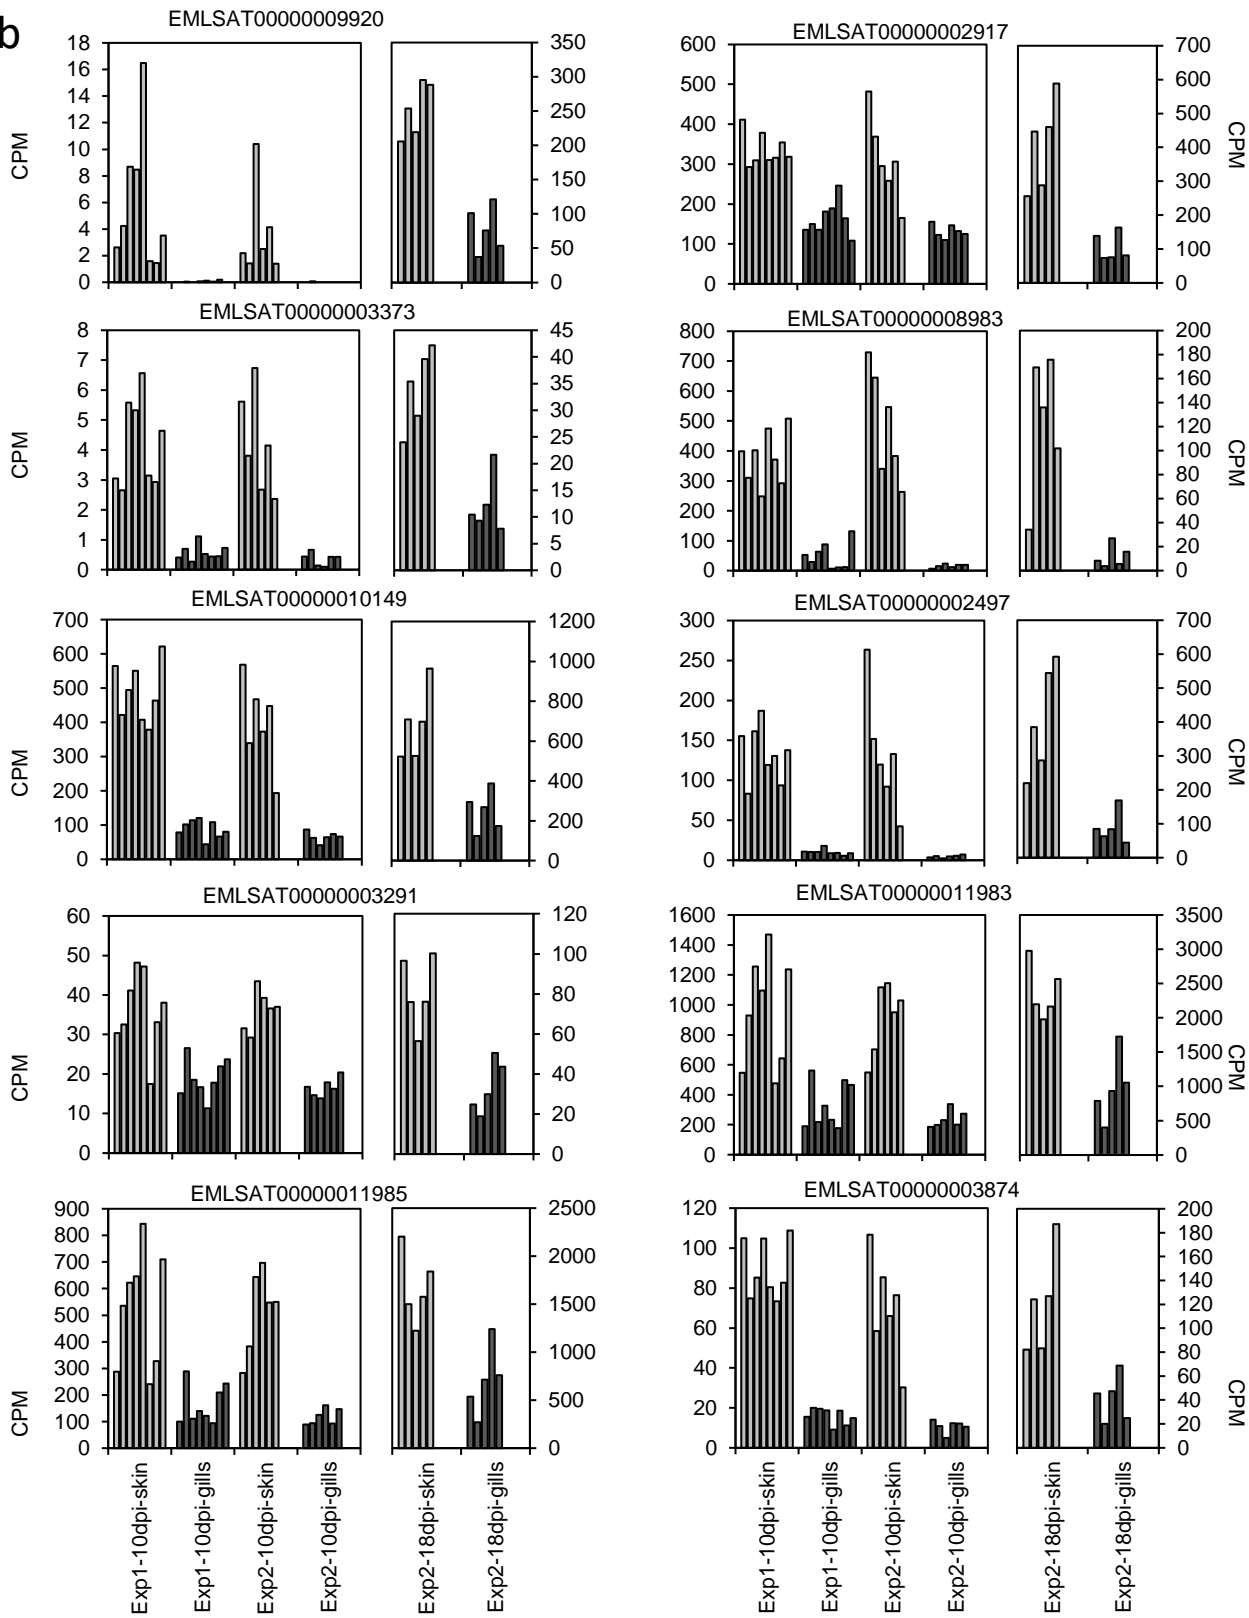

**Figure S2.** Expression profiles of strongest regulated genes. The expression profiles over all samples of the ten strongest genes (DESeq2; padj < 0.005, average fold-change > 2) upregulated in lice sampled from gills (a) and in lice sampled from skin (b).
