# Supplementary material for: Host gill attachment causes blood-feeding by the salmon louse (Lepeophtheirus salmonis) chalimus larvae and alters parasite development and transcriptome
Source: PubMed Central journal article supplement (PMC7201535; doi:10.1186/s13071-020-04096-0), 2020-05-06
Supplement: 13071_2020_4096_MOESM12_ESM.pdf [file 13071_2020_4096_MOESM12_ESM.pdf]

**a**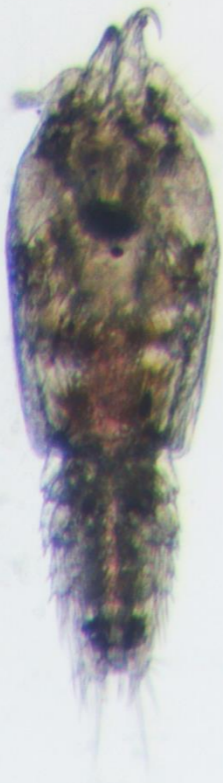**b**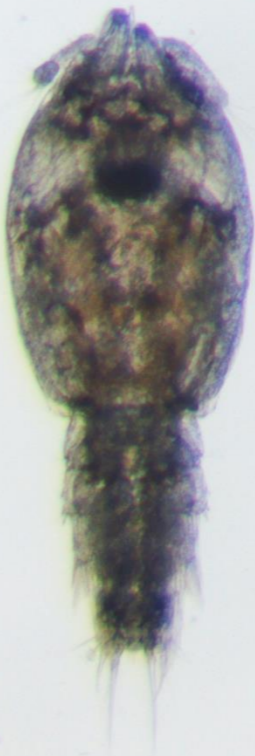

**Figure S3.** Copepodite with blood *versus* not blood filled intestine. The photographs show copepodites sampled at three days post-infestation with blood (a), sampled from gills and without blood (b) (samples not included in this study).
